# Supplementary material for: A Simple and Cost-Effective DNA Preparation Method Suitable for High-Throughput PCR Quantification of Hepatitis B Virus Genomes
Source: MDPI journal article supplement (doi:10.3390/v12090928), 2020-08-24
Supplement: s1 [file s1]

## **A simple and cost-effective DNA-preparation method suitable for high-throughput PCR quantification of hepatitis B virus genomes**

Eunji Jo<sup>1</sup>, Jaewon Yang<sup>1</sup>, Alexander Koenig<sup>1</sup>, Seung Kew Yoon<sup>2,3</sup>, and Marc P. Windisch<sup>1,4\*</sup>

<sup>1</sup>Applied Molecular Virology Laboratory, Institut Pasteur Korea, 696 Sampyeong-dong, Bundang-gu, Seongnam-si, Gyeonggi-do, South Korea.

<sup>2</sup>Catholic University Liver Research Center, The Catholic University of Korea, Seoul, South Korea.

<sup>3</sup>Division of Gastroenterology and Hepatology, Department of Internal Medicine, College of Medicine, Seoul St. Mary's Hospital, The Catholic University of Korea, Seoul, South Korea.

<sup>4</sup>Division of Bio-Medical Science and Technology, University of Science and Technology, 217, Gajeong-ro, Yuseong-gu, Daejeon, South Korea.

\*Correspondence: marc.windisch@ip-korea.org; Tel.: +82-31-8018-8180; Fax: +82-31-8018-8014

Supplementary Figures

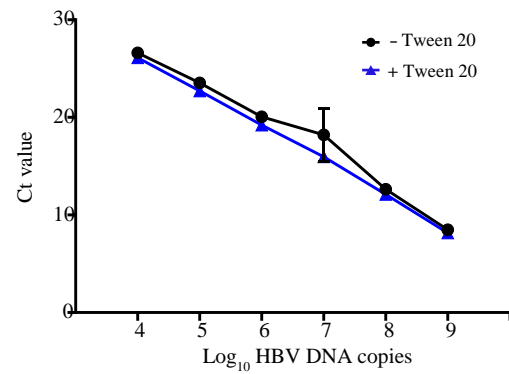

**Figure S1. Effect of Tween-20 on qPCR.** Standard curve of HBV plasmid DNA. DNA was quantified by qPCR analysis in the presence or absence of 5% Tween-20.

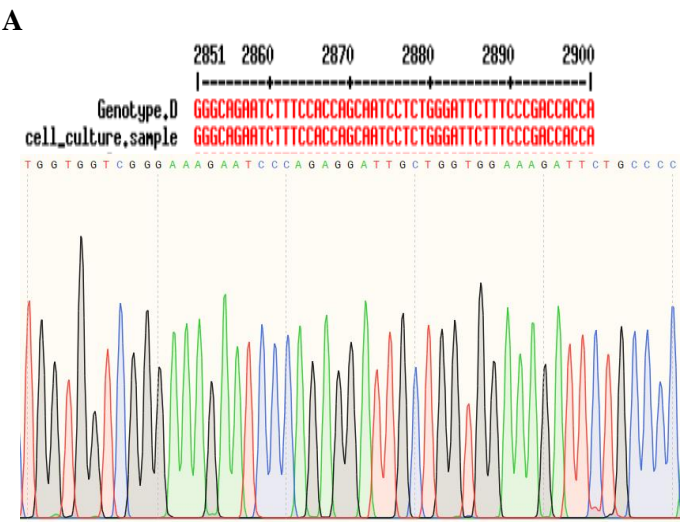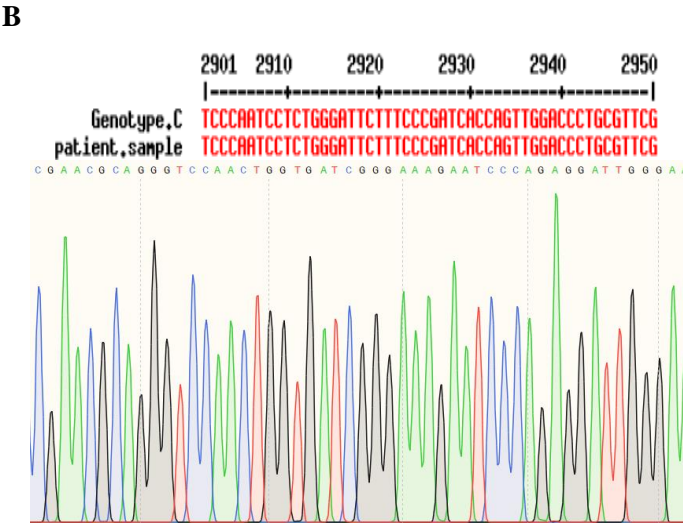

**Figure S2. DNA sequencing of HBV DNA prepared using the column-free method.** Chromatogram of DNA sequencing results from cell culture-derived HBV (A) and patient-derived HBV (B). HBV DNAs were isolated using a prep-free DNA preparation method, and the PreS1 through S genes were amplified using a Thermocycler Dice Touch (Takara Bio Inc., Shiga, Japan) with PrimeSTAR® HS Taq DNA polymerase (Takara Bio Inc., Shiga, Japan) as previously described [8]. Briefly, the pre-S1 through S regions were amplified using conserved universal primers (5'-TCACCATATTCTTGGGAACAAGA-3' and 5'-CGAACCACTGAACAAATGGC-3'), and HBV genotypes were detected based on sequencing by Bionics (Seoul, Korea). An HBV-specific PreS primer [9] (5'-CCCTAGAAAATTGAGAGAAGTCCA-3') was used for sequencing. The sequences obtained were compared with published sequences covering the same genomic region of 8 HBV genotypes, as available in the National Center for Biotechnology Information GenBank.
